# Supplementary material
Source: PubMed Central journal article supplement (PMC8356416)
Supplement: 12917_2021_2971_MOESM1_ESM.pdf [file 12917_2021_2971_MOESM1_ESM.pdf]

## Additional file 1 Literature search flow diagrams

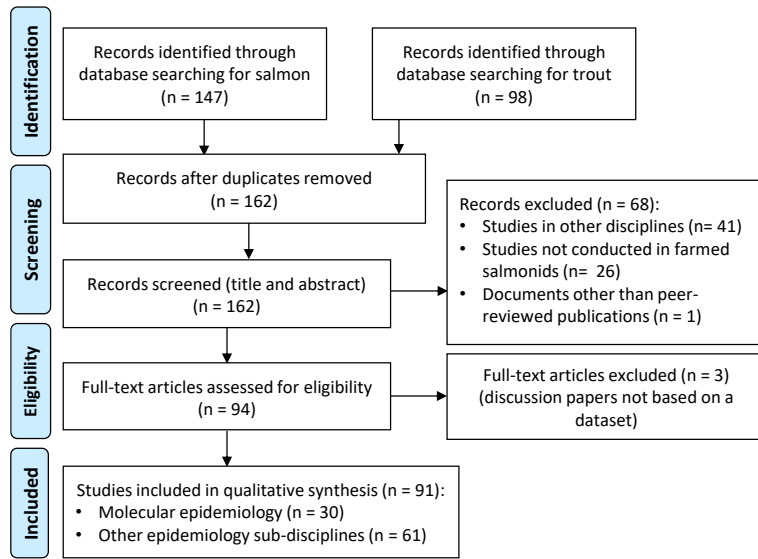

Figure 1. PRISMA flow diagram of the literature search for salmonids.

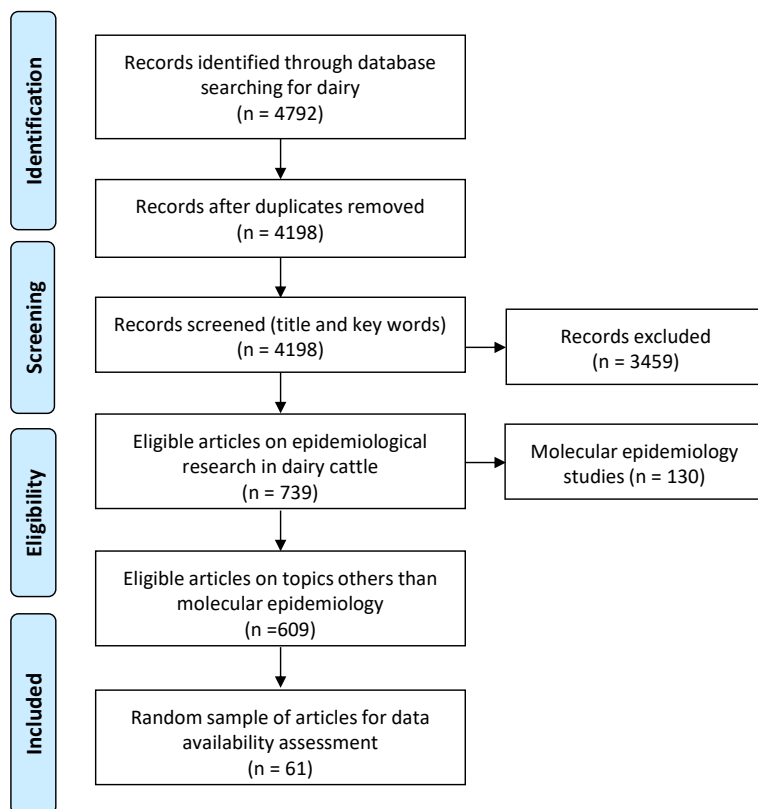

Figure 2. PRISMA flow diagram of the literature search for dairy cattle.
