# Supplementary material
Source: PubMed Central journal article supplement (PMC8356416)
Supplement: 12917_2021_2971_MOESM2_ESM.pdf [file 12917_2021_2971_MOESM2_ESM.pdf]

## Additional file 2 Full reference list of the literature review

- Adamek, M., Hellmann, J., Flamm, A., Teitge, F., Vendramin, N., Fey, D., Riße, K., Blakey, F., Rimstad, E., Steinhagen, D., 2019. Detection of piscine orthoreoviruses (PRV-1 and PRV-3) in Atlantic salmon and rainbow trout farmed in Germany. *Transbound. Emerg. Dis.* 66, 14–21. <https://doi.org/10.1111/tbed.13018>
- Adams, A.E., Lombard, J.E., Fossler, C.P., Román-Muñiz, I.N., Koprál, C.A., 2017. Associations between housing and management practices and the prevalence of lameness, hock lesions, and thin cows on US dairy operations. *J. DAIRY Sci.* 100, 2119–2136. <https://doi.org/10.3168/jds.2016-11517>
- Aldrin, M., Jansen, P.A., Stryhn, H., 2019. A partly stage-structured model for the abundance of salmon lice in salmonid farms. *Epidemics* 26, 9–22. <https://doi.org/10.1016/j.epidem.2018.08.001>
- Al-Mouqatea, S., Alkhamis, M., Akbar, B., Ali, A., Al-Aqeel, H., Bin-Heji, A., Razzaque, M., Alvarez, J., Perez, A., 2018. Bayesian estimation of ELISA and gamma interferon test accuracy for the detection of bovine tuberculosis in caudal fold test-negative dairy cattle in Kuwait. *J. Vet. Diagn. Investig. Off. Publ. Am. Assoc. Vet. Lab. Diagn. Inc* 30, 468–470. <https://doi.org/10.1177/1040638718759574>
- Amirpour Haredasht, S., Tavorpanich, S., Jansen, M.D., Lyngstad, T.M., Yatabe, T., Brun, E., Martínez-López, B., 2019. A stochastic network-based model to simulate the spread of pancreas disease (PD) in the Norwegian salmon industry based on the observed vessel movements and seaway distance between marine farms. *Prev. Vet. Med.* 167, 174–181. <https://doi.org/10.1016/j.prevetmed.2018.05.019>
- Anstey, I., Quigley, B.L., Polkinghorne, A., Jelocnik, M., 2019. Chlamydial infection and on-farm risk factors in dairy cattle herds in South East Queensland. *Aust. Vet. J.* 97, 505–508. <https://doi.org/10.1111/avj.12879>
- Arriagada, G., Hamilton-West, C., Nekouei, O., Foerster, C., Müller, A., Lara, M., Gallardo-Escárate, C., 2019. *Caligus rogercresseyi* infestation is associated with *Piscirickettsia salmonis*-attributed mortalities in farmed salmonids in Chile. *Prev. Vet. Med.* 171, 104771. <https://doi.org/10.1016/j.prevetmed.2019.104771>
- Arriagada, G., Sanchez, J., Stryhn, H., Vanderstichel, R., Campistó, J.L., Ibarra, R., St-Hilaire, S., 2018. A multivariable assessment of the spatio-temporal distribution of pyrethroids performance on the sea lice *Caligus rogercresseyi* in Chile. *Spat. Spatio-Temporal Epidemiol.* 26, 1–13. <https://doi.org/10.1016/j.sste.2018.04.004>
- Aslam, M.L., Robledo, D., Krasnov, A., Moghadam, H.K., Hillestad, B., Houston, R.D., Baranski, M., Boison, S., Robinson, N.A., 2020. Quantitative trait loci and genes associated with salmonid alphavirus load in Atlantic salmon: implications for pancreas disease resistance and tolerance. *Sci. Rep.* 10. <https://doi.org/10.1038/s41598-020-67405-8>
- Bang Jensen, B., Nylund, S., Svendsen, J.C., Ski, P.-M.R., Takle, H., 2019. Indications for a vertical transmission pathway of piscine myocarditis virus in Atlantic salmon (*Salmo salar* L.). *J. Fish Dis.* 42, 825–833. <https://doi.org/10.1111/jfd.12990>
- Bang Jensen, B., Qviller, L., Toft, N., 2020. Spatio-temporal variations in mortality during the seawater production phase of Atlantic salmon (*Salmo salar*) in Norway. *J. Fish Dis.* 43, 445–457. <https://doi.org/10.1111/jfd.13142>
- Barker, S.E., Bricknell, I.R., Covello, J., Purcell, S., Fast, M.D., Wolters, W., Bouchard, D.A., 2019. Sea lice, *Lepeophtheirus salmonis* (Krøyer 1837), infected Atlantic salmon (*Salmo salar* L.) are more susceptible to infectious salmon anemia virus. *PLOS ONE* 14, e0209178. <https://doi.org/10.1371/journal.pone.0209178>
- Bayliss, S.C., Verner-Jeffreys, D.W., Bartie, K.L., Aanensen, D.M., Sheppard, S.K., Adams, A., Feil, E.J., 2017. The Promise of Whole Genome Pathogen Sequencing for the Molecular Epidemiology

- of Emerging Aquaculture Pathogens. *Front. Microbiol.* 8, 121.  
<https://doi.org/10.3389/fmicb.2017.00121>
- Bayliss, S.C., Verner-Jeffreys, D.W., Ryder, D., Suarez, R., Ramirez, R., Romero, J., Pascoe, B., Sheppard, S.K., Godoy, M., Feil, E.J., 2018. Genomic epidemiology of the commercially important pathogen *Renibacterium salmoninarum* within the Chilean salmon industry. *Microb. Genomics* 4. <https://doi.org/10.1099/mgen.0.000201>
- Beaver, A., Meagher, R.K., von Keyserlingk, M.A.G., Weary, D.M., 2019. Invited review: A systematic review of the effects of early separation on dairy cow and calf health. *J. DAIRY Sci.* 102, 5784–5810. <https://doi.org/10.3168/jds.2018-15603>
- Biemans, F., Bijma, P., Boots, N.M., de Jong, M.C.M., 2018. Digital Dermatitis in dairy cattle: The contribution of different disease classes to transmission. *Epidemics* 23, 76–84.  
<https://doi.org/10.1016/j.epidem.2017.12.007>
- Blandford, M.I., Taylor-Brown, A., Schlacher, T.A., Nowak, B., Polkinghorne, A., 2018. Epitheliocystis in fish: An emerging aquaculture disease with a global impact. *Transbound. Emerg. Dis.* 65, 1436–1446. <https://doi.org/10.1111/tbed.12908>
- Boerlage, A.S., Ashby, A., Herrero, A., Reeves, A., Gunn, G.J., Rodger, H.D., 2020. Epidemiology of marine gill diseases in Atlantic salmon (*Salmo salar*) aquaculture: a review. *Rev. Aquac.*  
<https://doi.org/10.1111/raq.12426>
- Boerlage, A.S., Elghafghuf, A., Stryhn, H., Sanchez, J., Hammell, K.L., 2018. Risk factors associated with time to first clinical case of Bacterial Kidney Disease (BKD) in farmed Atlantic Salmon (*Salmo salar* L.) in New Brunswick, Canada. *Prev. Vet. Med.* 149, 98–106.  
<https://doi.org/10.1016/j.prevetmed.2017.11.014>
- Boerlage, A.S., Stryhn, H., Armstrong, B., Hammell, K.L., 2019. A 2-stage hierarchical interrupted time-series analysis to quantify the long-term effect of subclinical bacterial kidney disease on performance of farmed Atlantic salmon (*Salmo salar* L.). *Prev. Vet. Med.* 172, 104776.  
<https://doi.org/10.1016/j.prevetmed.2019.104776>
- Boerlage, A.S., Stryhn, H., Sanchez, J., Hammell, K.L., 2017. Case definition for clinical and subclinical bacterial kidney disease (BKD) in Atlantic Salmon (*Salmo salar* L.) in New Brunswick, Canada. *J. Fish Dis.* 40, 395–409. <https://doi.org/10.1111/jfd.12521>
- Borges, I.A., McCollum, A.M., Mehal, J.M., Haberling, D., Dutra, L.A.L., Vieira, F.N., Andrade, L.A.O., Kroon, E.G., Holman, R.C., Reynolds, M.G., Trindade, G.S., 2017. Dairy production practices and associated risks for bovine vaccinia exposure in cattle, Brazil. *New Microbes New Infect.* 20, 43–50. <https://doi.org/10.1016/j.nmni.2017.08.004>
- Bravo, F., Sidhu, J.P.S., Bernal, P., Bustamante, R.H., Condie, S., Gorton, B., Herzfeld, M., Jimenez, D., Mardones, F.O., Rizwi, F., Steven, A.D.L., 2020. Hydrodynamic connectivity, water temperature, and salinity are major drivers of piscirickettsiosis prevalence and transmission among salmonid farms in Chile. *Aquac. Environ. Interact.* 12, 263–279.  
<https://doi.org/10.3354/aei00368>
- Brosnahan, C.L., Munday, J.S., Ha, H.J., Preece, M., Jones, J.B., 2019. New Zealand rickettsia-like organism (NZ-RLO) and *Tenacibaculum maritimum*: Distribution and phylogeny in farmed Chinook salmon (*Oncorhynchus tshawytscha*). *J. Fish Dis.* 42, 85–95.  
<https://doi.org/10.1111/jfd.12909>
- Buczinski, S., Borris, M.E., Dubuc, J., 2018. Herd-level prevalence of the ultrasonographic lung lesions associated with bovine respiratory disease and related environmental risk factors. *J. DAIRY Sci.* 101, 2423–2432. <https://doi.org/10.3168/jds.2017-13459>
- Büyükekiz, A.G., Altun, S., Hansen, E.F., Satıcıoğlu, I.B., Duman, M., Markussen, T., Rimstad, E., 2018. Infectious pancreatic necrosis virus (IPNV) serotype Sp is prevalent in Turkish rainbow trout farms. *J. Fish Dis.* 41, 95–104. <https://doi.org/10.1111/jfd.12675>
- Chatziprodromidou, I.P., Apostolou, T., 2018. Diagnostic accuracy of enzyme-linked immunosorbent assay (ELISA) and immunoblot (IB) for the detection of antibodies against *Neospora caninum*

- in milk from dairy cows. *Epidemiol. Infect.* 146, 577–583.  
<https://doi.org/10.1017/S0950268817002916>
- Chung, J.J., Rayburn, M.C., Chigerwe, M., 2019. Randomized controlled clinical trial on the effect of oral immunoglobulin supplementation on neonatal dairy calves with diarrhea. *J. Vet. Intern. Med.* 33, 1807–1813. <https://doi.org/10.1111/jvim.15538>
- Corbett, C.S., de Jong, M.C.M., Orsel, K., De Buck, J., Barkema, H.W., 2019. Quantifying transmission of *Mycobacterium avium* subsp. *paratuberculosis* among group-housed dairy calves. *Vet. Res.* 50, 60. <https://doi.org/10.1186/s13567-019-0678-3>
- Cruvinel, L.B., Nicaretta, J.E., Bastos, T.S.A., Couto, L.F.M., Dos Santos, J.B., Zapa, D.M.B., Cavalcante, A.S.A., Cruz, B.C., Borges, D.G.L., Borges, F.A., Soares, V.E., Lopes, W.D.Z., 2018. *Eimeria* species in dairy and beef cattle of different ages in Goiás state, Brazil. *Rev. Bras. Parasitol. Vet.* 27, 169–176. <https://doi.org/10.1590/S1984-296120180038>
- Cummings, K.J., Virkler, P.D., Wagner, B., Lussier, E.A., Thompson, B.S., 2018. Herd-level prevalence of *Salmonella* Dublin among New York dairy farms based on antibody testing of bulk tank milk. *ZOOSES PUBLIC Health* 65, 1003–1007. <https://doi.org/10.1111/zph.12523>
- Cvetojevic, D., Milicevic, V., Kureljusic, B., Savic, B., 2018. Seroprevalence of *Neospora caninum* in dairy cows in Belgrade city area, Serbia. *J. Hell. Vet. Med. Soc.* 69, 979–983.  
<https://doi.org/10.12681/jhvms.18026>
- Dalen, G., Rachah, A., Nørstebø, H., Schukken, Y.H., Reksen, O., 2019. Dynamics of somatic cell count patterns as a proxy for transmission of mastitis pathogens. *J. DAIRY Sci.* 102, 11349–11358.  
<https://doi.org/10.3168/jds.2019-16847>
- Daros, R.R., Eriksson, H.K., Weary, D.M., von Keyserlingk, M.A.G., 2020. The relationship between transition period diseases and lameness, feeding time, and body condition during the dry period. *J. DAIRY Sci.* 103, 649–665. <https://doi.org/10.3168/jds.2019-16975>
- Deikun, L.L., Habing, G.G., Quigley, J.D., Proudfoot, K.L., 2020. Health and growth of veal calves provided a fatty acid supplement and a dry teat. *J. DAIRY Sci.* 103, 4633–4642.  
<https://doi.org/10.3168/jds.2019-17240>
- Deperasinska, I., Schulz, P., Siwicki, A.K., 2018. Salmonid alphavirus (SAV). *J. Vet. Res.* 62, 1–6.  
<https://doi.org/10.2478/jvetres-2018-0001>
- Dessen, J.-E., Mørkøre, T., Bildøy, J.I., Johnsen, S.N., Poppe, L.T., Hatlen, B., Thomassen, M.S., Rørvik, K.-A., 2019. Increased dietary protein-to-lipid ratio improves survival during naturally occurring pancreas disease in Atlantic salmon, *Salmo salar* L. *J. Fish Dis.* 42, 21–34.  
<https://doi.org/10.1111/jfd.12904>
- Dolecheck, K.A., Overton, M.W., Mark, T.B., Bewley, J.M., 2019. Use of a stochastic simulation model to estimate the cost per case of digital dermatitis, sole ulcer, and white line disease by parity group and incidence timing. *J. DAIRY Sci.* 102, 715–730. <https://doi.org/10.3168/jds.2018-14901>
- Douphrate, D.I., Fethke, N.B., Nonnenmann, M.W., Rodriguez, A., Gimeno Ruiz de Porras, D., 2019. Reliability of observational- and machine-based teat hygiene scoring methodologies. *J. DAIRY Sci.* 102, 7494–7502. <https://doi.org/10.3168/jds.2019-16351>
- Du, X., Bayliss, S.C., Feil, E.J., Liu, Y., Wang, C., Zhang, G., Zhou, D., Wei, D., Tang, N., Leclercq, S.O., Feng, J., 2019. Real time monitoring of *Aeromonas salmonicida* evolution in response to successive antibiotic therapies in a commercial fish farm. *Environ. Microbiol.* 21, 1113–1123. <https://doi.org/10.1111/1462-2920.14531>
- Dubuc, J., 2017. Short communication: Diagnostic performance of on-farm bacteriological culture systems for identification of uterine *Escherichia coli* in postpartum dairy cows. *J. DAIRY Sci.* 100, 3079–3082. <https://doi.org/10.3168/jds.2016-12315>
- Duman, M., Altun, S., Cengiz, M., Saticioglu, I.B., Buyukekiz, A.G., Sahinturk, P., 2017. Genotyping and antimicrobial resistance genes of *Yersinia ruckeri* isolates from rainbow trout farms. *Dis. Aquat. Organ.* 125, 31–44. <https://doi.org/10.3354/dao03132>

- Duman, M., Buyukekiz, A.G., Satcioglu, I.B., Cengiz, M., Sahinturk, P., Altun, S., 2020. Epidemiology, genotypic diversity, and antimicrobial resistance of *Lactococcus garvieae* in farmed rainbow trout (*Oncorhynchus mykiss*). *Iran. J. Fish. Sci.* 19, 1–18. <https://doi.org/10.22092/ijfs.2018.117609>
- Ekman, L., Nyman, A.-K., Landin, H., Magnusson, U., Waller, K.P., 2018a. Mild and severe udder cleft dermatitis-Prevalence and risk factors in Swedish dairy herds. *J. DAIRY Sci.* 101, 556–571. <https://doi.org/10.3168/jds.2017-13133>
- Ekman, L., Nyman, A.-K., Landin, H., Persson Waller, K., 2018b. Hock lesions in dairy cows in freestall herds: A cross-sectional study of prevalence and risk factors. *ACTA Vet. Scand.* 60. <https://doi.org/10.1186/s13028-018-0401-9>
- Ellis, J., DeLong, K.L., Lambert, D.M., Schexnayder, S., Krawczel, P., Oliver, S., 2020. Analysis of closed versus operating dairies in the southeastern United States. *J. DAIRY Sci.* 103, 5148–5161. <https://doi.org/10.3168/jds.2019-17516>
- Escobar, L.E., Escobar-Dodero, J., Phelps, N.B.D., 2018. Infectious disease in fish: global risk of viral hemorrhagic septicemia virus. *Rev. Fish Biol. Fish.* 28, 637–655. <https://doi.org/10.1007/s11160-018-9524-3>
- Escobar-Dodero, J., Kinsley, A., Perez, A.M., Ibarra, R., Tello, A., Monti, G., Mardones, F.O., 2019. Risk factors for infectious pancreatic necrosis in farmed Chilean Atlantic salmon (*Salmo salar* L.) from 2010 to 2013. *Prev. Vet. Med.* 167, 182–189. <https://doi.org/10.1016/j.prevetmed.2018.04.016>
- Esmaili, S., Mohabati Mobarez, A., Khalili, M., Mostafavi, E., 2019. High prevalence and risk factors of *Coxiella burnetii* in milk of dairy animals with a history of abortion in Iran. *Comp. Immunol. Microbiol. Infect. Dis.* 63, 127–130. <https://doi.org/10.1016/j.cimid.2019.01.015>
- Esser, N.M., Su, H., Coblenz, W.K., Akins, M.S., Kieke, B.A., Martin, N.P., Borchardt, M.A., Jokela, W.E., 2019. Efficacy of recycled sand or organic solids as bedding sources for lactating cows housed in freestalls. *J. DAIRY Sci.* 102, 6682–6698. <https://doi.org/10.3168/jds.2018-15851>
- Estevez, R.A., Mardones, F.O., Alamos, F., Arriagada, G., Carey, J., Corre, C., Escobar-Dodero, J., Gaete, A., Gallardo, A., Ibarra, R., Ortiz, C., Rozas-Serri, M., Sandoval, O., Santana, J., Gelcich, S., 2019. Eliciting expert judgements to estimate risk and protective factors for Piscirickettsiosis in Chilean salmon farming. *AQUACULTURE* 507, 402–410. <https://doi.org/10.1016/j.aquaculture.2019.04.028>
- Faisal, M., Loch, T.P., Shavali, M., VanDeuren, M.G., Standish, I., Winters, A., Glenney, G., Aho, J., Wolgamood, M., VanAmberg, J., Eisch, E., Whelan, G.E., 2019. Resurgence of Salmonid Herpesvirus-3 Infection (Epizootic Epitheliotropic Disease) in Hatchery-Propagated Lake Trout in Michigan. *J. Aquat. Anim. Health* 31, 31–45. <https://doi.org/10.1002/aah.10051>
- Feist, S.W., Thrush, M.A., Dunn, P., Bateman, K., Peeler, E.J., 2019. The aquatic animal pandemic crisis. *Rev. Sci. Tech. Int. Off. Epizoot.* 38, 437–457. <https://doi.org/10.20506/rst.38.2.2997>
- Fraslin, C., Brard-Fudulea, S., D'Ambrosio, J., Bestin, A., Charles, M., Haffray, P., Quillet, E., Phocas, F., 2019. Rainbow trout resistance to bacterial cold water disease: two new quantitative trait loci identified after a natural disease outbreak on a French farm. *Anim. Genet.* 50, 293–297. <https://doi.org/10.1111/age.12777>
- Gaete-Carrasco, A., Rosenfeld, C., Gallardo, A., 2019. Epidemiological analysis of the active surveillance programme for *Piscirickettsia salmonis* of the National Fisheries and Aquaculture Service of Chile. *Rev. Sci. Tech. Int. Off. Epizoot.* 38, 823–849. <https://doi.org/10.20506/rst.38.3.3029>
- Gallagher, M.D., Karlsen, M., Petterson, E., Haugland, O., Matejusova, I., Macqueen, D.J., 2020. Genome sequencing of SAV3 reveals repeated seeding events of viral strains in norwegian aquaculture. *Front. Microbiol.* 11. <https://doi.org/10.3389/fmicb.2020.00740>
- Gao, Y., Cao, J., Zhang, S., Zhang, Q., Sun, D., 2018. Short communication: Heritability estimates for susceptibility to *Mycobacterium avium* ssp. *paratuberculosis* infection in Chinese Holstein cattle. *J. DAIRY Sci.* 101, 7274–7279. <https://doi.org/10.3168/jds.2017-13264>

- Garseth, Å.H., Fritsvold, C., Svendsen, J.C., Bang Jensen, B., Mikalsen, A.B., 2018. Cardiomyopathy syndrome in Atlantic salmon *Salmo salar* L.: A review of the current state of knowledge. *J. Fish Dis.* 41, 11–26. <https://doi.org/10.1111/jfd.12735>
- Gautam, R., Price, D., Revie, C.W., Gardner, I.A., Vanderstichel, R., Gustafson, L., Klotins, K., Beattie, M., 2018. Connectivity-based risk ranking of infectious salmon anaemia virus (ISAv) outbreaks for targeted surveillance planning in Canada and the USA. *Prev. Vet. Med.* 159, 92–98. <https://doi.org/10.1016/j.prevetmed.2018.09.001>
- Gautam, R., Vanderstichel, R., Boerlage, A.S., Revie, C.W., Hammell, K.L., 2017a. Effect of timing of count events on estimates of sea lice abundance and interpretation of effectiveness following bath treatments. *J. Fish Dis.* 40, 367–375. <https://doi.org/10.1111/jfd.12519>
- Gautam, R., Vanderstichel, R., Boerlage, A.S., Revie, C.W., Hammell, K.L., 2017b. Evaluating bath treatment effectiveness in the control of sea lice burdens on Atlantic salmon in New Brunswick, Canada. *J. Fish Dis.* 40, 895–905. <https://doi.org/10.1111/jfd.12569>
- Gislason, H., 2018. Statistical modelling of sea lice count data from salmon farms in the Faroe Islands. *J. Fish Dis.* 41, 973–993. <https://doi.org/10.1111/jfd.12742>
- Gohary, K., LeBlanc, S.J., 2018. Cost of retained fetal membranes for dairy herds in the United States. *JAVMA-J. Am. Vet. Med. Assoc.* 252, 1485–1489. <https://doi.org/doi.org/10.2460/javma.252.12.1485>
- Gomez, D.E., Arroyo, L.G., Poljak, Z., Viel, L., Weese, J.S., 2017. Detection of bovine coronavirus in healthy and diarrheic dairy calves. *J. Vet. Intern. Med.* 31, 1884–1891. <https://doi.org/10.1111/jvim.14811>
- Goto, A., Takahara, K., Sugiura, T., Oikawa, S., Katamoto, H., Nakada, K., 2019. Association of postpartum diseases occurring within 60 days after calving with productivity and reproductive performance in dairy cows in Fukuoka: A cow-level, retrospective cohort study. *J. Vet. Med. Sci.* 81, 1055–1062. <https://doi.org/10.1292/jvms.18-0384>
- Guarracino, M., Qviller, L., Lillehaug, A., 2018. Evaluation of aquaculture management zones as a control measure for salmon lice in Norway. *Dis. Aquat. Organ.* 130, 1–9. <https://doi.org/10.3354/dao03254>
- Guerrero-Cabrera, L., Luna Olivera, B.C., Villavicencio-Pulido, J.G., Ortiz Luna, R.J., 2020. Proximity and density of neighboring farms and water supply, as risk factors for bacteriosis: A case study of spatial risk analysis in tilapia and rainbow trout farms of Oaxaca, Mexico. *Aquaculture* 520, 734955. <https://doi.org/10.1016/j.aquaculture.2020.734955>
- Guimarães, F.F., Manzi, M.P., Joaquim, S.F., Richini-Pereira, V.B., Langoni, H., 2017. Short communication: Outbreak of methicillin-resistant *Staphylococcus aureus* (MRSA)-associated mastitis in a closed dairy herd. *J. DAIRY Sci.* 100, 726–730. <https://doi.org/10.3168/jds.2016-11700>
- Gussmann, M., Steeneveld, W., Kirkeby, C., Hogeveen, H., Farre, M., Halasa, T., 2019. Economic and epidemiological impact of different intervention strategies for subclinical and clinical mastitis. *Prev. Vet. Med.* 166, 78–85. <https://doi.org/10.1016/j.prevetmed.2019.03.001>
- Haine, D., Delgado, H., Cue, R., Sewalem, A., Wade, K., Lacroix, R., Lefebvre, D., Arsenaault, J., Bouchard, É., Dubuc, J., 2017. Culling from the herd's perspective—Exploring herd-level management factors and culling rates in Québec dairy herds. *Prev. Vet. Med.* 147, 132–141. <https://doi.org/10.1016/j.prevetmed.2017.08.020>
- Happold, J., Meyer, A., Sadler, R., Cowled, B., Mackenzie, C., Gallardo Lagno, A., Cameron, A., 2020a. Effectiveness of antimicrobial treatment of salmonid rickettsial septicaemia in commercial salmon and trout farms in Chile. *Aquaculture* 525, 735323. <https://doi.org/doi.org/10.1016/j.aquaculture.2020.735323>
- Happold, J., Sadler, R., Meyer, A., Cowled, B., Mackenzie, C., Gallardo Lagno, A., Cameron, A., 2020b. Effectiveness of vaccination for the control of salmonid rickettsial septicaemia in commercial salmon and trout farms in Chile. *Aquaculture* 520, 734968. <https://doi.org/10.1016/j.aquaculture.2020.734968>

- Hayer, S.S., VanderWaal, K., Ranjan, R., Biswal, J.K., Subramaniam, S., Mohapatra, J.K., Sharma, G.K., Rout, M., Dash, B.B., Das, B., Prusty, B.R., Sharma, A.K., Stenfeldt, C., Perez, A., Delgado, A.H., Sharma, M.K., Rodriguez, L.L., Pattnaik, B., Arzt, J., 2018. Foot-and-mouth disease virus transmission dynamics and persistence in a herd of vaccinated dairy cattle in India. *Transbound. Emerg. Dis.* 65, e404–e415. <https://doi.org/10.1111/tbed.12774>
- Hellebø, A., Stene, A., Aspehaug, V., 2017. PCR survey for *Paramoeba perurans* in fauna, environmental samples and fish associated with marine farming sites for Atlantic salmon (*Salmo salar* L.). *J. Fish Dis.* 40, 661–670. <https://doi.org/10.1111/jfd.12546>
- Hillman, A., Zalcman, E., Burroughs, A., Meyer, A., Mackenzie, C., Sadler, R., Stevenson, M., Ward, M., Gallardo Lagno, A., Happold, J., Cameron, A., Cowled, B., 2020. Use of regulatory data to describe and identify risk factors for salmonid rickettsial septicaemia in Chile, 2011–2017. *Aquaculture* 526, 735324. <https://doi.org/doi.org/10.1016/j.aquaculture.2020.735324>
- Isla, A., Saldarriaga-Córdoba, M., Fuentes, D.E., Albornoz, R., Hausmann, D., Mancilla-Schulz, J., Martínez, A., Figueroa, J., Avendaño-Herrera, R., Yáñez, A., 2019. Multilocus sequence typing detects new *Piscirickettsia salmonis* hybrid genogroup in Chilean fish farms: Evidence for genetic diversity and population structure. *J. Fish Dis.* 42, 721–737. <https://doi.org/10.1111/jfd.12976>
- Jagielski, T., Krukowski, H., Bochniarz, M., Piech, T., Roeske, K., Bakuła, Z., Wlazło, Ł., Woch, P., 2019. Prevalence of *Prototheca* spp. on dairy farms in Poland - a cross-country study. *Microb. Biotechnol.* 12, 556–566. <https://doi.org/10.1111/1751-7915.13394>
- Jalali, S.A.H., Mohammadinezhad, R., Mohammadi, A., Latifian, M.H., Talebi, M., Soleimanin-Zad, S., Golkar, P., Hemmatzadeh, F., 2019. Molecular evolution and selection pressure analysis of infectious hematopoietic necrosis virus (IHNV) revealed the origin and phylogenetic relationship of Iranian isolates in recent epidemics in Iran. *Virology* 535, 45–58. <https://doi.org/10.1016/j.virol.2019.06.012>
- Jamali, H., Barkema, H.W., Jacques, M., Lavallée-Bourget, E.-M., Malouin, F., Saini, V., Stryhn, H., Dufour, S., 2018. Invited review: Incidence, risk factors, and effects of clinical mastitis recurrence in dairy cows. *J. DAIRY Sci.* 101, 4729–4746. <https://doi.org/10.3168/jds.2017-13730>
- Jansen, M.D., Bang Jensen, B., McLoughlin, M.F., Rodger, H.D., Taksdal, T., Sindre, H., Graham, D.A., Lillehaug, A., 2017. The epidemiology of pancreas disease in salmonid aquaculture: a summary of the current state of knowledge. *J. Fish Dis.* 40, 141–155. <https://doi.org/10.1111/jfd.12478>
- Jansen, M.D., Guarracino, M., Carson, M., Modahl, I., Taksdal, T., Sindre, H., Brun, E., Tavoranpanich, S., 2019. Field evaluation of diagnostic test sensitivity and specificity for salmonid alphavirus (SAV) infection and pancreas disease (PD) in farmed atlantic salmon (*salmo salar* L.) in norway using bayesian latent class analysis. *Front. Vet. Sci.* 6. <https://doi.org/10.3389/fvets.2019.00419>
- Janssen, K., Komen, H., Saatkamp, H.W., de Jong, M.C.M., Bijma, P., 2018. Derivation of the economic value of  $R(0)$  for macroparasitic diseases and application to sea lice in salmon. *Genet. Sel. Evol. GSE* 50, 47. <https://doi.org/10.1186/s12711-018-0418-6>
- Jia, P., Breyta, R.B., Li, Q., Qian, X., Wu, B., Zheng, W., Wen, Z., Liu, Y., Kurath, G., Hua, Q., Jin, N., Liu, H., 2018. Insight into infectious hematopoietic necrosis virus (IHNV) in Chinese rainbow trout aquaculture from virus isolated from 7 provinces in 2010–2014. *Aquaculture* 496, 239–246. <https://doi.org/10.1016/j.aquaculture.2018.06.062>
- Johnsen, I.A., Stien, L.H., Sandvik, A.D., Asplin, L., Oppedal, F., 2020. Optimal estimation of lice release from aquaculture based on ambient temperatures. *Aquac. Environ. Interact.* 12, 179–191. <https://doi.org/10.3354/aei00358>
- Johnson-Mackinnon, J.C., Crosbie, P.B.B., Karlsbakk, E., Marcos-Lopez, M., Paley, R., Nowak, B.F., Bridle, A.R., 2019. Multilocus Sequence Typing (MLST) and Random Polymorphic DNA (RAPD)

- Comparisons of Geographic Isolates of *Neoparamoeba perurans*, the Causative Agent of Amoebic Gill Disease. *Pathog. Basel Switz.* 8. <https://doi.org/10.3390/pathogens8040244>
- Jones, A.E., Munro, L.A., Green, D.M., Morgan, K.L., Murray, A.G., Norman, R., Ryder, D., Salama, N.K.G., Taylor, N.G.H., Thrush, M.A., Wallace, I.S., Sharkey, K.J., 2019. The contact structure of Great Britain's salmon and trout aquaculture industry. *Epidemics* 28, 100342. <https://doi.org/10.1016/j.epidem.2019.05.001>
- Jones, S.R.M., Long, A., MacWilliams, C., Polinski, M., Garver, K., 2020. Factors associated with severity of naturally occurring piscirickettsiosis in netpen- and tank-reared juvenile Atlantic salmon at a research aquarium in western Canada. *J. Fish Dis.* 43, 49–55. <https://doi.org/10.1111/jfd.13102>
- Karami, A.M., Bani, A., Pourkazemi, M., Ghasemi, M., Kania, P.W., Buchmann, K., 2018. Comparative susceptibilities and immune reactions of wild and cultured populations of Caspian trout *Salmo trutta caspius* to VHSV. *Dis. Aquat. Organ.* 128, 187–201. <https://doi.org/10.3354/dao03231>
- Karlsen, C., Ottem, K.F., Brevik, Ø.J., Davey, M., Sørum, H., Winther-Larsen, H.C., 2017. The environmental and host-associated bacterial microbiota of Arctic seawater-farmed Atlantic salmon with ulcerative disorders. *J. Fish Dis.* 40, 1645–1663. <https://doi.org/10.1111/jfd.12632>
- Karzis, J., Petzer, I.-M., Donkin, E.F., Naidoo, V., 2018. Proactive udder health management in South Africa and monitoring of antibiotic resistance of *Staphylococcus aureus*; in dairy herds from 2001 to 2010. *J. S. Afr. Vet. Assoc.* 89, e1–e8. <https://doi.org/10.4102/jsava.v89i0.1490>
- Kelley, J.M., Rathinasamy, V., Elliott, T.P., Rawlin, G., Beddoe, T., Stevenson, M.A., Spithill, T.W., 2020. Determination of the prevalence and intensity of *Fasciola hepatica* infection in dairy cattle from six irrigation regions of Victoria, South-eastern Australia, further identifying significant triclabendazole resistance on three properties. *Vet. Parasitol.* 277, 109019. <https://doi.org/10.1016/j.vetpar.2019.109019>
- Kelly, E., McAloon, C.G., O'Grady, L., Duane, M., Somers, J.R., Beltman, M.E., 2020. Cow-level risk factors for reproductive tract disease diagnosed by 2 methods in pasture-grazed dairy cattle in Ireland. *J. DAIRY Sci.* 103, 737–749. <https://doi.org/10.3168/jds.2019-17064>
- Kibenge, M.J.T., Wang, Y., Gayeski, N., Morton, A., Beardslee, K., McMillan, B., Kibenge, F.S.B., 2019. Piscine orthoreovirus sequences in escaped farmed Atlantic salmon in Washington and British Columbia. *Virology* 16, 41. <https://doi.org/10.1186/s12985-019-1148-2>
- Knupp, C., Wiens, G.D., Faisal, M., Call, D.R., Cain, K.D., Nicolas, P., Van Vliet, D., Yamashita, C., Ferguson, J.A., Meuninck, D., Hsu, H.-M., Baker, B.B., Shen, L., Loch, T.P., 2019. Large-Scale Analysis of *Flavobacterium psychrophilum* Multilocus Sequence Typing Genotypes Recovered from North American Salmonids Indicates that both Newly Identified and Recurrent Clonal Complexes Are Associated with Disease. *Appl. Environ. Microbiol.* 85. <https://doi.org/10.1128/AEM.02305-18>
- Kristoffersen, A.B., Devold, M., Aspehaug, V., Gjelstenli, O., Breck, O., Bang Jensen, B., 2018. Molecular tracing confirms that infection with infectious pancreatic necrosis virus follows the smolt from hatchery to grow-out farm. *J. Fish Dis.* 41, 1601–1607. <https://doi.org/10.1111/jfd.12844>
- la Bastide, P.Y. de, Naumann, C., Hintz, W.E., 2018. Assessment of intra-specific variability in *Saprolegnia parasitica* populations of aquaculture facilities in British Columbia, Canada. *Dis. Aquat. Organ.* 128, 235–248. <https://doi.org/10.3354/dao03224>
- Lillehaug, A., Børnes, C., Grave, K., 2018. A pharmaco-epidemiological study of antibacterial treatments and bacterial diseases in Norwegian aquaculture from 2011 to 2016. *Dis. Aquat. Organ.* 128, 117–125. <https://doi.org/10.3354/dao03219>
- Lipkens, Z., Piepers, S., De Visscher, A., De Vlieghe, S., 2019. Evaluation of test-day milk somatic cell count information to predict intramammary infection with major pathogens in dairy cattle at drying off. *J. DAIRY Sci.* 102, 4309–4321. <https://doi.org/10.3168/jds.2018-15642>

- Liu, H., Li, S., Meng, L., Dong, L., Zhao, S., Lan, X., Wang, J., Zheng, N., 2017. Prevalence, antimicrobial susceptibility, and molecular characterization of *Staphylococcus aureus* isolated from dairy herds in northern China. *J. DAIRY Sci.* 100, 8796–8803. <https://doi.org/10.3168/jds.2017-13370>
- Loch, T.P., Faisal, M., 2018. Flavobacteria colonizing the early life stages of hatchery-incubated Chinook salmon *Oncorhynchus tshawytscha* (Walbaum 1792) are markedly diverse. *J. Fish Dis.* 41, 829–845. <https://doi.org/10.1111/jfd.12795>
- Macchi, M.V., Suanes, A., Salaberry, X., Fernandez, F., Piaggio, J., Gil, A.D., 2020. Epidemiological study of neosporosis in Uruguayan dairy herds. *Prev. Vet. Med.* 179. <https://doi.org/10.1016/j.prevetmed.2020.105022>
- MacKinnon, B., Jones, P., Hawkins, L., Dohoo, I., Stryhn, H., Vanderstichel, R., St-Hilaire, S., 2019. The epidemiology of skin ulcers in saltwater reared Atlantic salmon (*Salmo salar*) in Atlantic Canada. *Aquaculture* 501, 230–238. <https://doi.org/10.1016/j.aquaculture.2018.11.035>
- Mahendran, S.A., Booth, R., Beekhuis, L., Manning, A., Blackmore, T., Vanhoudt, A., Bell, N., 2017. Assessing the effects of weekly preweaning health scores on dairy calf mortality and productivity parameters: cohort study. *Vet. Rec.* 181, 196. <https://doi.org/10.1136/vr.104197>
- Mancilla-Schulz, J., Marín, S.L., Molinet, C., 2019. Dynamics of *Caligus rogercresseyi* (Boxshall & Bravo, 2000) in farmed Atlantic salmon (*Salmo salar*) in southern Chile: Are we controlling sea lice? *J. Fish Dis.* 42, 357–369. <https://doi.org/10.1111/jfd.12931>
- Mardones, F.O., Paredes, F., Medina, M., Tello, A., Valdivia, V., Ibarra, R., Correa, J., Gelcich, S., 2018. Identification of research gaps for highly infectious diseases in aquaculture: The case of the endemic *Piscirickettsia salmonis* in the Chilean salmon farming industry. *Aquaculture* 482, 211–220. <https://doi.org/10.1016/j.aquaculture.2017.09.048>
- Medeiros, T.N.S., Lorenzetti, E., Massi, R.P., Alfieri, A.F., Alfieri, A.A., 2020. Neonatal diarrhea and rotavirus A infection in beef and dairy calves, Brazil, 2006-2015 [Diarreia neonatal e infecção por rotavírus A em bezerros de corte e leite, Brasil, 2006-2015]. *Pesqui. Vet. Bras.* 40, 7–11. <https://doi.org/10.1590/1678-5150-PVB-5919>
- Meyer, A., Burroughs, A., Sadler, R., Happold, J., Cowled, B., Mackenzie, C., Gallardo Lagno, AL, Cameron, A., 2019. Quantifying the effects of sea lice burden and lice bathing treatments on salmonid rickettsial septicaemia in commercial salmon and trout farms in Chile. *Aquaculture* 513, 734411. <https://doi.org/10.1016/j.aquaculture.2019.734411>
- Meyer, A., Sadler, R., Bannister-Tyrrell, M., Gallardo Lagno, AL, Stegeman, A., Cameron, A., 2020. Is between-farm water-borne pathogen dissemination an important driver in the epidemiology of salmonid rickettsial septicaemia in Chile? *Aquaculture* 530, 735751. <https://doi.org/10.1016/j.aquaculture.2020.735751>
- Milne, M.G., Graham, J., Allen, A., McCormick, C., Presho, E., Skuce, R., Byrne, A.W., 2019. Variation in *Mycobacterium bovis* genetic richness suggests that inwards cattle movements are a more important source of infection in beef herds than in dairy herds. *BMC Microbiol.* 19. <https://doi.org/10.1186/s12866-019-1530-7>
- Miranda, C.D., Godoy, F.A., Lee, M.R., 2018. Current Status of the Use of Antibiotics and the Antimicrobial Resistance in the Chilean Salmon Farms. *Front. Microbiol.* 9, 1284. <https://doi.org/10.3389/fmicb.2018.01284>
- Miyama, T., Byaruhanga, J., Okamura, I., Nagahata, H., Murata, R., Mwebembezi, W., Muramatsu, Y., Makita, K., 2020. Prevalence of sub-clinical mastitis and its association with milking practices in an intensive dairy production region of Uganda. *J. Vet. Med. Sci.* 82, 488–493. <https://doi.org/10.1292/jvms.19-0588>
- Mullin, B.R., Reyda, F.B., 2020. High Prevalence of the Copepod *Salmincola californiensis* in Steelhead Trout in Lake Ontario Following its Recent Invasion. *J. Parasitol.* 106, 198–200.
- Myksvoll, M.S., Sandvik, A.D., Albretsen, J., Asplin, L., Johnsen, I.A., Karlsen, Ø., Kristensen, N.M., Melsom, A., Skardhamar, J., Ådlandsvik, B., 2018. Evaluation of a national operational



- salmon lice monitoring system-From physics to fish. *PLoS One* 13, e0201338. <https://doi.org/10.1371/journal.pone.0201338>
- Nekouei, O., Vanderstichel, R., Kaukinen, K.H., Thakur, K., Ming, T., Patterson, D.A., Trudel, M., Neville, C., Miller, K.M., 2019. Comparison of infectious agents detected from hatchery and wild juvenile Coho salmon in British Columbia, 2008-2018. *PLoS One* 14, e0221956. <https://doi.org/10.1371/journal.pone.0221956>
- Ngo, T.P.H., Bartie, K.L., Thompson, K.D., Verner-Jeffreys, D.W., Hoare, R., Adams, A., 2017. Genetic and serological diversity of *Flavobacterium psychrophilum* isolates from salmonids in United Kingdom. *Vet. Microbiol.* 201, 216–224. <https://doi.org/10.1016/j.vetmic.2017.01.032>
- Olsen, A.B., Gulla, S., Steinum, T., Colquhoun, D.J., Nilsen, H.K., Duchaud, E., 2017. Multilocus sequence analysis reveals extensive genetic variety within *Tenacibaculum* spp. associated with ulcers in sea-farmed fish in Norway. *Vet. Microbiol.* 205, 39–45. <https://doi.org/10.1016/j.vetmic.2017.04.028>
- Otten, N.D., Toft, N., Thomsen, P.T., Houe, H., 2019. Evaluation of the performance of register data as indicators for dairy herds with high lameness prevalence. *ACTA Vet. Scand.* 61, 49. <https://doi.org/10.1186/s13028-019-0484-y>
- Pajdak-Czaus, J., Platt-Samoraj, A., Szweda, W., Siwicki, A.K., Terech-Majewska, E., 2019. *Yersinia ruckeri*—A threat not only to rainbow trout. *Aquac. Res.* 50, 3083–3096. <https://doi.org/10.1111/are.14274>
- Pantoja, J.C.F., Correia, L.B.N., Rossi, R.S., Latosinski, G.S., 2020. Association between teat-end hyperkeratosis and mastitis in dairy cows: A systematic review. *J. DAIRY Sci.* 103, 1843–1855. <https://doi.org/10.3168/jds.2019-16811>
- Park, H.-S., Moon, D.C., Hyun, B.-H., Lim, S.-K., 2019. Short communication: Occurrence and persistence of *Prototheca zopfii* in dairy herds of Korea. *J. DAIRY Sci.* 102, 2539–2543. <https://doi.org/10.3168/jds.2018-14979>
- Peruzzi, S., Puvanendran, V., Riesen, G., Seim, R.R., Hagen, Ø., Martínez-Llorens, S., Falk-Petersen, I.-B., Fernandes, J.M.O., Jobling, M., 2018. Growth and development of skeletal anomalies in diploid and triploid Atlantic salmon (*Salmo salar*) fed phosphorus-rich diets with fish meal and hydrolyzed fish protein. *PLoS One* 13, e0194340. <https://doi.org/10.1371/journal.pone.0194340>
- Petersen, M.B., Wawegama, N.K., Denwood, M., Markham, P.F., Browning, G.F., Nielsen, L.R., 2018. *Mycoplasma bovis* antibody dynamics in naturally exposed dairy calves according to two diagnostic tests. *BMC Vet. Res.* 14. <https://doi.org/10.1186/s12917-018-1574-1>
- Price, D., Ibarra, R., Sánchez, J., St-Hilaire, S., 2017. A retrospective assessment of the effect of fallowing on piscirickettsiosis in Chile. *Aquaculture* 473, 400–406. <https://doi.org/10.1016/j.aquaculture.2017.02.034>
- Räihä, V., Sundberg, L.-R., Ashrafi, R., Hyvärinen, P., Karvonen, A., 2019. Rearing background and exposure environment together explain higher survival of aquaculture fish during a bacterial outbreak. *J. Appl. Ecol.* 56, 1741–1750. <https://doi.org/10.1111/1365-2664.13393>
- Reimus, K., Orro, T., Emanuelson, U., Viltrop, A., Mõtus, K., 2018. On-farm mortality and related risk factors in Estonian dairy cows. *Prev. Vet. Med.* 155, 53–60. <https://doi.org/10.1016/j.prevetmed.2018.04.006>
- Rodríguez, F.H., Flores-Mara, R., Yoshida, G.M., Barría, A., Jedlicki, A.M., Lhorente, J.P., Reyes-López, F., Yáñez, J.M., 2019. Genome-Wide Association Analysis for Resistance to Infectious Pancreatic Necrosis Virus Identifies Candidate Genes Involved in Viral Replication and Immune Response in Rainbow Trout (*Oncorhynchus mykiss*). *G3 Bethesda Md* 9, 2897–2904. <https://doi.org/10.1534/g3.119.400463>
- Røsæg, M.V., Garseth, Å.H., Brynildsrud, O.B., Jansen, M.D., 2019. Pancreas disease caused by Salmonid alphavirus subtype 2 reduces growth and feed conversion in farmed Atlantic salmon. *Prev. Vet. Med.* 169, 104699. <https://doi.org/10.1016/j.prevetmed.2019.104699>

- Rosaeg, M.V., Rimstad, E., Guttvik, A., Skjelstad, B., Bendiksen, E.A., Garseth, A.H., 2019. Effect of pancreas disease caused by SAV 2 on protein and fat digestion in Atlantic salmon. *J. FISH Dis.* 42, 97–108. <https://doi.org/10.1111/jfd.12914>
- Ryputa, K., Płoneczka-Janeczko, K., Czopowicz, M., Klimowicz-Bodys, M.D., Shabunin, S., Siegwalt, G., 2020. Occurrence of BVDV Infection and the Presence of Potential Risk Factors in Dairy Cattle Herds in Poland. *Anim. Open Access J. MDPI* 10. <https://doi.org/10.3390/ani10020230>
- Salama, N.K.G., Dale, A.C., Ivanov, V.V., Cook, P.F., Pert, C.C., Collins, C.M., Rabe, B., 2018. Using biological-physical modelling for informing sea lice dispersal in Loch Linnhe, Scotland. *J. Fish Dis.* 41, 901–919. <https://doi.org/10.1111/jfd.12693>
- Samsing, F., Johnsen, I., Dempster, T., Oppedal, F., Trembl, E.A., 2017. Network analysis reveals strong seasonality in the dispersal of a marine parasite and identifies areas for coordinated management. *Landsc. Ecol.* 32, 1953–1967. <https://doi.org/10.1007/s10980-017-0557-0>
- Samsing, F., Johnsen, I., Trembl, E.A., Dempster, T., 2019. Identifying “firebreaks” to fragment dispersal networks of a marine parasite. *Int. J. Parasitol.* 49, 277–286. <https://doi.org/10.1016/j.ijpara.2018.11.005>
- Scott, H., Gilleard, J.S., Jelinski, M., Barkema, H.W., Redman, E.M., Avramenko, R.W., Luby, C., Kelton, D.F., Bauman, C.A., Keefe, G., Dubuc, J., Uehlinger, F.D., 2019. Prevalence, fecal egg counts, and species identification of gastrointestinal nematodes in replacement dairy heifers in Canada. *J. DAIRY Sci.* 102, 8251–8263. <https://doi.org/10.3168/jds.2018-16115>
- Scott, K., Kelton, D.F., Duffield, T.F., Renaud, D.L., 2019. Risk factors identified on arrival associated with morbidity and mortality at a grain-fed veal facility: A prospective, single-cohort study. *J. DAIRY Sci.* 102, 9224–9235. <https://doi.org/10.3168/jds.2019-16829>
- Serrano-Martínez, M.E., Cisterna, C.A.B., Romero, R.C.E., Huacho, M.A.Q., Bermabé, A.M., Albornoz, L.A.L., 2019. Evaluation of abortions spontaneously induced by *Neospora caninum* and risk factors in dairy cattle from Lima, Peru. *Rev. Bras. Parasitol. Vet. Braz. J. Vet. Parasitol. Orgao Of. Col. Bras. Parasitol. Vet.* 28, 215–220. <https://doi.org/10.1590/S1984-29612019026>
- Småge, S.B., Brevik, Ø.J., Frisch, K., Watanabe, K., Duesund, H., Nylund, A., 2017. Concurrent jellyfish blooms and tenacibaculosis outbreaks in Northern Norwegian Atlantic salmon (*Salmo salar*) farms. *PLoS One* 12, e0187476. <https://doi.org/10.1371/journal.pone.0187476>
- Söderlund, R., Hakhverdyan, M., Aspan, A., Jansson, E., 2018. Genome analysis provides insights into the epidemiology of infection with *Flavobacterium psychrophilum* among farmed salmonid fish in Sweden. *Microb. Genomics* 4. <https://doi.org/10.1099/mgen.0.000241>
- Soler-Jiménez, L.C., Paredes-Trujillo, A.I., Vidal-Martínez, V.M., 2017. Helminth parasites of finfish commercial aquaculture in Latin America. *J. Helminthol.* 91, 110–136. <https://doi.org/10.1017/S0022149X16000833>
- Solomon, D., Shpigel, N.Y., Salamon, H., Goshen, T., 2020. Epidemiology and risk factors of pyelonephritis in Israeli dairy cattle. *Isr. J. Vet. Med.* 75, 6–11.
- Sørensen, J., Vendramin, N., Priess, C., Kannimuthu, D., Henriksen, N.H., Iburg, T.M., Olesen, N.J., Cuenca, A., 2020. Emergence and Spread of Piscine orthoreovirus Genotype 3. *Pathog. Basel Switz.* 9. <https://doi.org/10.3390/pathogens9100823>
- Svendsen, J.C., Nylund, S., Kristoffersen, A.B., Takle, H., Fossberg Buhaug, J., Jensen, B.B., 2019. Monitoring infection with Piscine myocarditis virus and development of cardiomyopathy syndrome in farmed Atlantic salmon (*Salmo salar* L.) in Norway. *J. Fish Dis.* 42, 511–518. <https://doi.org/10.1111/jfd.12974>
- Terceti, M.S., Vences, A., Matanza, X.M., Dalsgaard, I., Pedersen, K., Osorio, C.R., 2018. Molecular Epidemiology of *Photobacterium damsela* subsp. *damsela* Outbreaks in Marine Rainbow Trout Farms Reveals Extensive Horizontal Gene Transfer and High Genetic Diversity. *Front. Microbiol.* 9. <https://doi.org/10.3389/fmicb.2018.02155>
- Ulrich, K., Wehner, S., Bekaert, M., Di Paola, N., Dilcher, M., Muir, K.F., Taggart, J.B., Matejusova, I., Weidmann, M., 2018. Molecular epidemiological study on Infectious Pancreatic Necrosis

- Virus isolates from aquafarms in Scotland over three decades. *J. Gen. Virol.* 99, 1567–1581. <https://doi.org/10.1099/jgv.0.001155>
- Urie, N.J., Lombard, J.E., Shivley, C.B., Koprak, C.A., Adams, A.E., Earleywine, T.J., Olson, J.D., Garry, F.B., 2018. Preweaned heifer management on US dairy operations: Part V. Factors associated with morbidity and mortality in preweaned dairy heifer calves. *J. DAIRY Sci.* 101, 9229–9244. <https://doi.org/10.3168/jds.2017-14019>
- Valldecabres, A., Pires, J.A.A., Silva-Del-Río, N., 2019. Cow-level factors associated with subclinical hypocalcemia at calving in multiparous Jersey cows. *J. DAIRY Sci.* 102, 8367–8375. <https://doi.org/10.3168/jds.2018-16180>
- Venjakob, P.L., Staufienbiel, R., Heuwieser, W., Borchardt, S., 2019. Serum calcium dynamics within the first 3 days in milk and the associated risk of acute puerperal metritis. *J. DAIRY Sci.* 102, 11428–11438. <https://doi.org/10.3168/jds.2019-16721>
- Vennerström, P., Välimäki, E., Lyytikäinen, T., Hautaniemi, M., Vidgren, G., Koski, P., Virtala, A.-M., 2017. Viral haemorrhagic septicaemia virus (VHSV Id) infections are detected more consistently using syndromic vs. active surveillance. *Dis. Aquat. Organ.* 126, 111–123. <https://doi.org/10.3354/dao03161>
- Wang, Yu, Robertson, I.D., Cheng, S., Wang, Yan, Hou, L., Wang, G., Wu, X., Li, X., Chen, Y., Guo, A., 2020. Evaluation of a milk ELISA as an alternative to a serum ELISA in the determination of the prevalence and incidence of brucellosis in dairy herds in Hubei Province, China. *Prev. Vet. Med.* 182. <https://doi.org/10.1016/j.prevetmed.2020.105086>
- Yang, D.A., Heuer, C., Laven, R., Vink, W.D., Chesterton, R.N., 2017. Farm and cow-level prevalence of bovine digital dermatitis on dairy farms in Taranaki, New Zealand. *N. Z. Vet. J.* 65, 252–256. <https://doi.org/10.1080/00480169.2017.1344587>
- Yang, D.A., Johnson, W.O., Müller, K.R., Gates, M.C., Laven, R.A., 2019. Estimating the herd and cow level prevalence of bovine digital dermatitis on New Zealand dairy farms: A Bayesian superpopulation approach. *Prev. Vet. Med.* 165, 76–84. <https://doi.org/10.1016/j.prevetmed.2019.02.014>
- Yugo, D.M., Cossaboom, C.M., Heffron, C.L., Huang, Y.-W., Kenney, S.P., Woolums, A.R., Hurley, D.J., Opriessnig, T., Li, L., Delwart, E., Kanevsky, I., Meng, X.-J., 2019. Evidence for an unknown agent antigenically related to the hepatitis E virus in dairy cows in the United States. *J. Med. Virol.* 91, 677–686. <https://doi.org/10.1002/jmv.25339>
- Zalcman, E., Burroughs, A., Meyer, A., Mackenzie, C., Sadler, R., Stevenson, M., Ward, M., Gallardo Lagno, A., Happold, J., Cameron, A., Cowled, B., 2021. Sea lice infestation of salmonids in Chile between 2011 and 2017: Use of regulatory data to describe characteristics and identify risk factors. *Aquaculture* 530, 735752. <https://doi.org/10.1016/j.aquaculture.2020.735752>
